# Supplementary material
Source: publisher figshare collection journal article supplement (https://acs.figshare.com/ndownloader/files/5187949)
Supplement: Supplementary file 1 [file 5187949]

#ja036999i
 
data_02049 
 
_audit_creation_method            SHELXL-97 
_chemical_name_systematic 
; 
 ? 
; 
_chemical_name_common             ? 
_chemical_melting_point           ? 
_chemical_formula_moiety          'C25 H51 N2 P2 Re Si2' 
_chemical_formula_sum 
 'C25 H51 N2 P2 Re Si2' 
_chemical_formula_weight          684.00 
 
loop_ 
 _atom_type_symbol 
 _atom_type_description 
 _atom_type_scat_dispersion_real 
 _atom_type_scat_dispersion_imag 
 _atom_type_scat_source 
 'C'  'C'   0.0033   0.0016 
 'International Tables Vol C Tables 4.2.6.8 and 6.1.1.4' 
 'H'  'H'   0.0000   0.0000 
 'International Tables Vol C Tables 4.2.6.8 and 6.1.1.4' 
 'N'  'N'   0.0061   0.0033 
 'International Tables Vol C Tables 4.2.6.8 and 6.1.1.4' 
 'Si'  'Si'   0.0817   0.0704 
 'International Tables Vol C Tables 4.2.6.8 and 6.1.1.4' 
 'P'  'P'   0.1023   0.0942 
 'International Tables Vol C Tables 4.2.6.8 and 6.1.1.4' 
 'Re'  'Re'  -1.0185   7.2310 
 'International Tables Vol C Tables 4.2.6.8 and 6.1.1.4' 
 
_symmetry_cell_setting            monoclinic
_symmetry_space_group_name_H-M    P2(1)/n
 
loop_ 
 _symmetry_equiv_pos_as_xyz 
 'x, y, z' 
 '-x+1/2, y+1/2, -z+1/2' 
 '-x, -y, -z' 
 'x-1/2, -y-1/2, z-1/2' 
 
_cell_length_a                    10.5307(4) 
_cell_length_b                    14.7683(5) 
_cell_length_c                    19.5511(7) 
_cell_angle_alpha                 90.00 
_cell_angle_beta                  92.6040(10) 
_cell_angle_gamma                 90.00 
_cell_volume                      3037.46(19) 
_cell_formula_units_Z             4 
_cell_measurement_temperature     120(2) 
_cell_measurement_reflns_used     8454
_cell_measurement_theta_min       4.4
_cell_measurement_theta_max       30.0
 
_exptl_crystal_description        block
_exptl_crystal_colour             black
_exptl_crystal_size_max           0.22 
_exptl_crystal_size_mid           0.18 
_exptl_crystal_size_min           0.10 
_exptl_crystal_density_meas       ? 
_exptl_crystal_density_diffrn     1.496 
_exptl_crystal_density_method     'not measured' 
_exptl_crystal_F_000              1392 
_exptl_absorpt_coefficient_mu     4.201 
_exptl_absorpt_correction_type    'multi-scans' 
_exptl_absorpt_correction_T_min   0.4584 
_exptl_absorpt_correction_T_max   0.6787 
_exptl_absorpt_process_details    'SADABS, R. Blessing (1995)'
 
_exptl_special_details 
; 
 ? 
; 
 
_diffrn_ambient_temperature       120(2) 
_diffrn_radiation_wavelength      0.71073 
_diffrn_radiation_type            MoK\a 
_diffrn_radiation_source          'fine-focus sealed tube' 
_diffrn_radiation_monochromator   graphite 
_diffrn_measurement_details 
 '0.30 degree frames measured for 7 seconds each' 
_diffrn_measurement_method        \w-scans 
_diffrn_measurement_device        'three-circle goniometer with fixed chi' 
_diffrn_measurement_device_type   'Bruker Platform goniometer' 
_diffrn_detector                  'CCD area detector' 
_diffrn_detector_type             'Bruker SMART 6000' 
_diffrn_standards_number          775 
_diffrn_standards_interval_count  ? 
_diffrn_standards_interval_time   323
_diffrn_standards_decay_%         0.0
_diffrn_reflns_number             55076 
_diffrn_reflns_av_R_equivalents   0.0258 
_diffrn_reflns_av_sigmaI/netI     0.0155 
_diffrn_reflns_limit_h_min        -14 
_diffrn_reflns_limit_h_max        14 
_diffrn_reflns_limit_k_min        -20 
_diffrn_reflns_limit_k_max        20 
_diffrn_reflns_limit_l_min        -27 
_diffrn_reflns_limit_l_max        27 
_diffrn_reflns_theta_min          2.09 
_diffrn_reflns_theta_max          30.03 
_reflns_number_total              8869 
_reflns_number_gt                 8284 
_reflns_threshold_expression      >2sigma(I) 
 
_computing_data_collection        'SMART (Bruker, 1999)' 
_computing_cell_refinement        'SAINT (Bruker, 1999)' 
_computing_data_reduction         'SAINT (Bruker, 1999)' 
_computing_structure_solution     'SIR-92 (Alatomare et al., 1993)' 
_computing_structure_refinement   'SHELXL-97 (Sheldrick, 1997)' 
_computing_molecular_graphics     'XTEL (local library)' 
_computing_publication_material   'XCIF (Bruker, 1999), XTEL (local library)' 
 
_refine_special_details 
; 
 Refinement of F^2^ against ALL reflections.  The weighted R-factor wR and 
 goodness of fit S are based on F^2^, conventional R-factors R are based 
 on F, with F set to zero for negative F^2^. The threshold expression of 
 F^2^ > 2sigma(F^2^) is used only for calculating R-factors(gt) etc. and is 
 not relevant to the choice of reflections for refinement.  R-factors based 
 on F^2^ are statistically about twice as large as those based on F, and R- 
 factors based on ALL data will be even larger. 
; 
 
_refine_ls_structure_factor_coef  Fsqd  
_refine_ls_matrix_type            full 
_refine_ls_weighting_scheme       calc  
_refine_ls_weighting_details 
 'calc w=1/[\s^2^(Fo^2^)+(0.0196P)^2^+2.1382P] where P=(Fo^2^+2Fc^2^)/3' 
_atom_sites_solution_primary      direct 
_atom_sites_solution_secondary    difmap 
_atom_sites_solution_hydrogens    mixed 
_refine_ls_hydrogen_treatment     mixed 
_refine_ls_extinction_method      none 
_refine_ls_extinction_coef        ? 
_refine_ls_number_reflns          8869 
_refine_ls_number_parameters      305 
_refine_ls_number_restraints      0 
_refine_ls_R_factor_all           0.0181 
_refine_ls_R_factor_gt            0.0161 
_refine_ls_wR_factor_ref          0.0419 
_refine_ls_wR_factor_gt           0.0408 
_refine_ls_goodness_of_fit_ref    1.064 
_refine_ls_restrained_S_all       1.064 
_refine_ls_shift/su_max           0.005 
_refine_ls_shift/su_mean          0.000 
 
loop_ 
 _atom_site_label 
 _atom_site_type_symbol 
 _atom_site_fract_x 
 _atom_site_fract_y 
 _atom_site_fract_z 
 _atom_site_U_iso_or_equiv 
 _atom_site_adp_type 
 _atom_site_occupancy 
 _atom_site_symmetry_multiplicity 
 _atom_site_calc_flag 
 _atom_site_refinement_flags 
 _atom_site_disorder_assembly 
 _atom_site_disorder_group 
Re1 Re 0.384638(5) 0.306795(4) 0.628751(3) 0.01432(2) Uani 1 1 d . . . 
H1R H 0.373(3) 0.2013(16) 0.6607(14) 0.036(7) Uiso 1 1 d . . . 
P1 P 0.23332(4) 0.27185(3) 0.53761(2) 0.01893(8) Uani 1 1 d . . . 
P2 P 0.50712(4) 0.33915(3) 0.73087(2) 0.01694(7) Uani 1 1 d . . . 
Si1 Si 0.11763(4) 0.41393(3) 0.62443(3) 0.02238(9) Uani 1 1 d . . . 
Si2 Si 0.23283(5) 0.35948(3) 0.76520(2) 0.02169(9) Uani 1 1 d . . . 
N1 N 0.23860(13) 0.36598(9) 0.67631(7) 0.0188(3) Uani 1 1 d . . . 
C1 C 0.1688(2) 0.52761(14) 0.59548(12) 0.0347(4) Uani 1 1 d . . . 
H1A H 0.1813 0.5676 0.6352 0.052 Uiso 1 1 calc R . . 
H1B H 0.1033 0.5531 0.5639 0.052 Uiso 1 1 calc R . . 
H1C H 0.2488 0.5220 0.5721 0.052 Uiso 1 1 calc R . . 
C2 C -0.03771(19) 0.42736(15) 0.66581(13) 0.0373(5) Uani 1 1 d . . . 
H2A H -0.0334 0.4797 0.6966 0.056 Uiso 1 1 calc R . . 
H2B H -0.0557 0.3727 0.6921 0.056 Uiso 1 1 calc R . . 
H2C H -0.1054 0.4367 0.6305 0.056 Uiso 1 1 calc R . . 
C3 C 0.08589(19) 0.33418(15) 0.55093(12) 0.0343(4) Uani 1 1 d . . . 
H3A H 0.0169 0.2916 0.5615 0.041 Uiso 1 1 calc R . . 
H3B H 0.0597 0.3684 0.5091 0.041 Uiso 1 1 calc R . . 
C4 C 0.17795(18) 0.15157(12) 0.53273(9) 0.0253(3) Uani 1 1 d . . . 
H4A H 0.2548 0.1131 0.5268 0.030 Uiso 1 1 calc R . . 
C5 C 0.1198(2) 0.12167(17) 0.59912(11) 0.0389(5) Uani 1 1 d . . . 
H5A H 0.1030 0.0564 0.5974 0.058 Uiso 1 1 calc R . . 
H5B H 0.0399 0.1543 0.6048 0.058 Uiso 1 1 calc R . . 
H5C H 0.1790 0.1351 0.6379 0.058 Uiso 1 1 calc R . . 
C6 C 0.0849(2) 0.13188(15) 0.47178(10) 0.0332(4) Uani 1 1 d . . . 
H6A H 0.0550 0.0692 0.4744 0.050 Uiso 1 1 calc R . . 
H6B H 0.1282 0.1407 0.4289 0.050 Uiso 1 1 calc R . . 
H6C H 0.0123 0.1732 0.4731 0.050 Uiso 1 1 calc R . . 
C7 C 0.2658(2) 0.29744(13) 0.44718(9) 0.0292(4) Uani 1 1 d . . . 
H7A H 0.1865 0.2837 0.4191 0.035 Uiso 1 1 calc R . . 
C8 C 0.2932(3) 0.39869(17) 0.43868(12) 0.0510(7) Uani 1 1 d . . . 
H8A H 0.3056 0.4119 0.3903 0.077 Uiso 1 1 calc R . . 
H8B H 0.3703 0.4148 0.4660 0.077 Uiso 1 1 calc R . . 
H8C H 0.2213 0.4340 0.4543 0.077 Uiso 1 1 calc R . . 
C9 C 0.3704(2) 0.2382(2) 0.42049(10) 0.0417(5) Uani 1 1 d . . . 
H9A H 0.3803 0.2510 0.3718 0.063 Uiso 1 1 calc R . . 
H9B H 0.3480 0.1743 0.4263 0.063 Uiso 1 1 calc R . . 
H9C H 0.4505 0.2510 0.4461 0.063 Uiso 1 1 calc R . . 
C10 C 0.1506(2) 0.25302(16) 0.78965(11) 0.0373(5) Uani 1 1 d . . . 
H10A H 0.0638 0.2529 0.7693 0.056 Uiso 1 1 calc R . . 
H10B H 0.1477 0.2497 0.8396 0.056 Uiso 1 1 calc R . . 
H10C H 0.1971 0.2007 0.7728 0.056 Uiso 1 1 calc R . . 
C11 C 0.1525(2) 0.45655(18) 0.80718(12) 0.0449(6) Uani 1 1 d . . . 
H11A H 0.0602 0.4509 0.7997 0.067 Uiso 1 1 calc R . . 
H11B H 0.1810 0.5136 0.7874 0.067 Uiso 1 1 calc R . . 
H11C H 0.1744 0.4559 0.8564 0.067 Uiso 1 1 calc R . . 
C12 C 0.40078(18) 0.35384(14) 0.80161(9) 0.0262(4) Uani 1 1 d . . . 
H12A H 0.4223 0.4103 0.8269 0.031 Uiso 1 1 calc R . . 
H12B H 0.4103 0.3023 0.8339 0.031 Uiso 1 1 calc R . . 
C13 C 0.59731(17) 0.44760(11) 0.73065(9) 0.0221(3) Uani 1 1 d . . . 
H13A H 0.6510 0.4466 0.6898 0.026 Uiso 1 1 calc R . . 
C14 C 0.5037(2) 0.52669(12) 0.72104(11) 0.0308(4) Uani 1 1 d . . . 
H14A H 0.5507 0.5822 0.7113 0.046 Uiso 1 1 calc R . . 
H14B H 0.4575 0.5349 0.7630 0.046 Uiso 1 1 calc R . . 
H14C H 0.4433 0.5135 0.6827 0.046 Uiso 1 1 calc R . . 
C15 C 0.6863(2) 0.46497(13) 0.79354(10) 0.0307(4) Uani 1 1 d . . . 
H15A H 0.7276 0.5240 0.7890 0.046 Uiso 1 1 calc R . . 
H15B H 0.7512 0.4174 0.7969 0.046 Uiso 1 1 calc R . . 
H15C H 0.6371 0.4646 0.8349 0.046 Uiso 1 1 calc R . . 
C16 C 0.62647(17) 0.25701(12) 0.76525(9) 0.0235(3) Uani 1 1 d . . . 
H16A H 0.6631 0.2815 0.8096 0.028 Uiso 1 1 calc R . . 
C17 C 0.5674(2) 0.16504(13) 0.77974(11) 0.0330(4) Uani 1 1 d . . . 
H17A H 0.6331 0.1241 0.7988 0.050 Uiso 1 1 calc R . . 
H17B H 0.5304 0.1395 0.7370 0.050 Uiso 1 1 calc R . . 
H17C H 0.5007 0.1724 0.8127 0.050 Uiso 1 1 calc R . . 
C18 C 0.73543(18) 0.24520(15) 0.71683(11) 0.0338(4) Uani 1 1 d . . . 
H18A H 0.8068 0.2147 0.7411 0.051 Uiso 1 1 calc R . . 
H18B H 0.7629 0.3047 0.7010 0.051 Uiso 1 1 calc R . . 
H18C H 0.7063 0.2086 0.6774 0.051 Uiso 1 1 calc R . . 
N2 N 0.52416(14) 0.21767(11) 0.58130(7) 0.0221(3) Uani 1 1 d . . . 
C19 C 0.50671(17) 0.38426(12) 0.57798(9) 0.0232(3) Uani 1 1 d . . . 
H19A H 0.4904 0.4475 0.5762 0.028 Uiso 1 1 calc R . . 
C20 C 0.61143(18) 0.35323(13) 0.54577(9) 0.0268(4) Uani 1 1 d . . . 
H20A H 0.6709 0.3917 0.5250 0.032 Uiso 1 1 calc R . . 
C21 C 0.62092(17) 0.25821(14) 0.54700(9) 0.0256(3) Uani 1 1 d . . . 
C22 C 0.7153(2) 0.20570(16) 0.51606(12) 0.0365(5) Uani 1 1 d . . . 
H22A H 0.7813 0.2347 0.4929 0.044 Uiso 1 1 calc R . . 
C23 C 0.7112(2) 0.11365(17) 0.51954(13) 0.0425(5) Uani 1 1 d . . . 
H23A H 0.7743 0.0781 0.4990 0.051 Uiso 1 1 calc R . . 
C24 C 0.6132(2) 0.07224(15) 0.55373(12) 0.0371(5) Uani 1 1 d . . . 
H24A H 0.6086 0.0081 0.5566 0.045 Uiso 1 1 calc R . . 
C25 C 0.52306(19) 0.12567(13) 0.58329(10) 0.0277(4) Uani 1 1 d . . . 
H25A H 0.4567 0.0966 0.6062 0.033 Uiso 1 1 calc R . . 
 
loop_ 
 _atom_site_aniso_label 
 _atom_site_aniso_U_11 
 _atom_site_aniso_U_22 
 _atom_site_aniso_U_33 
 _atom_site_aniso_U_23 
 _atom_site_aniso_U_13 
 _atom_site_aniso_U_12 
Re1 0.01480(3) 0.01422(3) 0.01376(3) 0.00111(2) -0.00127(2) -0.00071(2) 
P1 0.01888(18) 0.02004(19) 0.01738(18) -0.00032(15) -0.00431(14) -0.00057(15) 
P2 0.01817(18) 0.01668(18) 0.01568(17) 0.00153(14) -0.00251(14) -0.00322(14) 
Si1 0.0183(2) 0.0207(2) 0.0279(2) -0.00082(18) -0.00211(17) 0.00323(17) 
Si2 0.0223(2) 0.0228(2) 0.0203(2) -0.00312(17) 0.00426(17) -0.00113(17) 
N1 0.0188(6) 0.0171(6) 0.0206(6) -0.0004(5) 0.0013(5) -0.0004(5) 
C1 0.0345(10) 0.0259(9) 0.0434(11) 0.0107(8) -0.0019(8) 0.0033(8) 
C2 0.0216(9) 0.0328(10) 0.0578(14) -0.0001(9) 0.0056(9) 0.0041(8) 
C3 0.0263(9) 0.0356(10) 0.0399(11) -0.0088(9) -0.0117(8) 0.0081(8) 
C4 0.0286(9) 0.0247(8) 0.0221(8) 0.0010(6) -0.0038(6) -0.0084(7) 
C5 0.0421(12) 0.0459(12) 0.0282(10) 0.0080(9) -0.0042(8) -0.0202(10) 
C6 0.0363(10) 0.0350(10) 0.0275(9) -0.0028(8) -0.0065(8) -0.0132(8) 
C7 0.0359(10) 0.0327(9) 0.0180(8) 0.0057(7) -0.0092(7) -0.0122(8) 
C8 0.0790(19) 0.0426(13) 0.0294(10) 0.0185(9) -0.0199(11) -0.0273(13) 
C9 0.0312(10) 0.0748(17) 0.0192(8) -0.0003(10) 0.0012(7) -0.0083(11) 
C10 0.0383(11) 0.0436(12) 0.0301(10) 0.0057(9) 0.0049(8) -0.0170(9) 
C11 0.0485(13) 0.0492(13) 0.0371(11) -0.0178(10) 0.0016(10) 0.0163(11) 
C12 0.0266(8) 0.0350(10) 0.0170(7) -0.0011(7) 0.0009(6) -0.0043(7) 
C13 0.0257(8) 0.0165(7) 0.0235(8) 0.0016(6) -0.0039(6) -0.0046(6) 
C14 0.0389(10) 0.0191(8) 0.0337(10) -0.0017(7) -0.0053(8) 0.0002(7) 
C15 0.0355(10) 0.0249(9) 0.0307(9) 0.0017(7) -0.0098(8) -0.0116(8) 
C16 0.0266(8) 0.0194(7) 0.0236(8) 0.0044(6) -0.0104(6) -0.0042(6) 
C17 0.0410(11) 0.0228(8) 0.0341(10) 0.0088(7) -0.0117(8) -0.0072(8) 
C18 0.0244(9) 0.0309(10) 0.0453(11) 0.0045(8) -0.0067(8) 0.0055(7) 
N2 0.0207(7) 0.0259(7) 0.0195(6) -0.0009(5) -0.0022(5) 0.0011(6) 
C19 0.0274(8) 0.0210(8) 0.0209(7) 0.0024(6) -0.0016(6) -0.0028(6) 
C20 0.0248(8) 0.0332(9) 0.0228(8) 0.0022(7) 0.0043(6) -0.0083(7) 
C21 0.0208(8) 0.0333(9) 0.0229(8) -0.0012(7) 0.0010(6) 0.0000(7) 
C22 0.0264(10) 0.0482(12) 0.0352(11) -0.0056(9) 0.0050(8) 0.0031(9) 
C23 0.0362(11) 0.0446(13) 0.0467(13) -0.0123(10) 0.0035(9) 0.0120(10) 
C24 0.0397(11) 0.0292(10) 0.0421(11) -0.0081(9) -0.0030(9) 0.0093(9) 
C25 0.0304(9) 0.0227(8) 0.0293(9) -0.0026(7) -0.0067(7) 0.0039(7) 
 
_geom_special_details 
; 
 All esds (except the esd in the dihedral angle between two l.s. planes) 
 are estimated using the full covariance matrix.  The cell esds are taken 
 into account individually in the estimation of esds in distances, angles 
 and torsion angles; correlations between esds in cell parameters are only 
 used when they are defined by crystal symmetry.  An approximate (isotropic) 
 treatment of cell esds is used for estimating esds involving l.s. planes. 
; 
 
loop_ 
 _geom_bond_atom_site_label_1 
 _geom_bond_atom_site_label_2 
 _geom_bond_distance 
 _geom_bond_site_symmetry_2 
 _geom_bond_publ_flag 
Re1 C19 2.0156(18) . ? 
Re1 N1 2.0307(14) . ? 
Re1 N2 2.2081(15) . ? 
Re1 P2 2.3757(4) . ? 
Re1 P1 2.3923(4) . ? 
Re1 H1R 1.69(2) . ? 
P1 C3 1.834(2) . ? 
P1 C7 1.8549(19) . ? 
P1 C4 1.8707(18) . ? 
P2 C12 1.8316(18) . ? 
P2 C16 1.8510(18) . ? 
P2 C13 1.8622(17) . ? 
Si1 N1 1.7425(15) . ? 
Si1 C1 1.859(2) . ? 
Si1 C2 1.868(2) . ? 
Si1 C3 1.876(2) . ? 
Si2 N1 1.7443(15) . ? 
Si2 C10 1.868(2) . ? 
Si2 C11 1.872(2) . ? 
Si2 C12 1.8782(19) . ? 
C1 H1A 0.9800 . ? 
C1 H1B 0.9800 . ? 
C1 H1C 0.9800 . ? 
C2 H2A 0.9800 . ? 
C2 H2B 0.9800 . ? 
C2 H2C 0.9800 . ? 
C3 H3A 0.9900 . ? 
C3 H3B 0.9900 . ? 
C4 C5 1.526(3) . ? 
C4 C6 1.535(3) . ? 
C4 H4A 1.0000 . ? 
C5 H5A 0.9800 . ? 
C5 H5B 0.9800 . ? 
C5 H5C 0.9800 . ? 
C6 H6A 0.9800 . ? 
C6 H6B 0.9800 . ? 
C6 H6C 0.9800 . ? 
C7 C9 1.518(3) . ? 
C7 C8 1.533(3) . ? 
C7 H7A 1.0000 . ? 
C8 H8A 0.9800 . ? 
C8 H8B 0.9800 . ? 
C8 H8C 0.9800 . ? 
C9 H9A 0.9800 . ? 
C9 H9B 0.9800 . ? 
C9 H9C 0.9800 . ? 
C10 H10A 0.9800 . ? 
C10 H10B 0.9800 . ? 
C10 H10C 0.9800 . ? 
C11 H11A 0.9800 . ? 
C11 H11B 0.9800 . ? 
C11 H11C 0.9800 . ? 
C12 H12A 0.9900 . ? 
C12 H12B 0.9900 . ? 
C13 C15 1.533(2) . ? 
C13 C14 1.534(3) . ? 
C13 H13A 1.0000 . ? 
C14 H14A 0.9800 . ? 
C14 H14B 0.9800 . ? 
C14 H14C 0.9800 . ? 
C15 H15A 0.9800 . ? 
C15 H15B 0.9800 . ? 
C15 H15C 0.9800 . ? 
C16 C17 1.526(3) . ? 
C16 C18 1.530(3) . ? 
C16 H16A 1.0000 . ? 
C17 H17A 0.9800 . ? 
C17 H17B 0.9800 . ? 
C17 H17C 0.9800 . ? 
C18 H18A 0.9800 . ? 
C18 H18B 0.9800 . ? 
C18 H18C 0.9800 . ? 
N2 C25 1.359(2) . ? 
N2 C21 1.381(2) . ? 
C19 C20 1.373(3) . ? 
C19 H19A 0.9500 . ? 
C20 C21 1.407(3) . ? 
C20 H20A 0.9500 . ? 
C21 C22 1.417(3) . ? 
C22 C23 1.362(3) . ? 
C22 H22A 0.9500 . ? 
C23 C24 1.396(3) . ? 
C23 H23A 0.9500 . ? 
C24 C25 1.382(3) . ? 
C24 H24A 0.9500 . ? 
C25 H25A 0.9500 . ? 
 
loop_ 
 _geom_angle_atom_site_label_1 
 _geom_angle_atom_site_label_2 
 _geom_angle_atom_site_label_3 
 _geom_angle 
 _geom_angle_site_symmetry_1 
 _geom_angle_site_symmetry_3 
 _geom_angle_publ_flag 
C19 Re1 N1 119.63(7) . . ? 
C19 Re1 N2 71.34(7) . . ? 
N1 Re1 N2 168.87(6) . . ? 
C19 Re1 P2 88.03(5) . . ? 
N1 Re1 P2 85.53(4) . . ? 
N2 Re1 P2 97.28(4) . . ? 
C19 Re1 P1 100.01(5) . . ? 
N1 Re1 P1 86.64(4) . . ? 
N2 Re1 P1 89.53(4) . . ? 
P2 Re1 P1 170.828(15) . . ? 
C19 Re1 H1R 140.0(9) . . ? 
N1 Re1 H1R 99.2(9) . . ? 
N2 Re1 H1R 70.4(9) . . ? 
P2 Re1 H1R 85.4(9) . . ? 
P1 Re1 H1R 91.1(9) . . ? 
C3 P1 C7 103.14(10) . . ? 
C3 P1 C4 102.71(10) . . ? 
C7 P1 C4 102.44(8) . . ? 
C3 P1 Re1 109.00(7) . . ? 
C7 P1 Re1 121.36(6) . . ? 
C4 P1 Re1 116.00(6) . . ? 
C12 P2 C16 103.39(9) . . ? 
C12 P2 C13 103.25(9) . . ? 
C16 P2 C13 103.09(8) . . ? 
C12 P2 Re1 109.34(6) . . ? 
C16 P2 Re1 120.47(6) . . ? 
C13 P2 Re1 115.38(6) . . ? 
N1 Si1 C1 109.25(8) . . ? 
N1 Si1 C2 114.98(9) . . ? 
C1 Si1 C2 107.92(10) . . ? 
N1 Si1 C3 106.91(8) . . ? 
C1 Si1 C3 112.20(11) . . ? 
C2 Si1 C3 105.63(10) . . ? 
N1 Si2 C10 109.80(9) . . ? 
N1 Si2 C11 115.56(10) . . ? 
C10 Si2 C11 107.96(12) . . ? 
N1 Si2 C12 107.77(7) . . ? 
C10 Si2 C12 107.78(10) . . ? 
C11 Si2 C12 107.70(10) . . ? 
Si1 N1 Si2 123.01(8) . . ? 
Si1 N1 Re1 117.20(7) . . ? 
Si2 N1 Re1 119.60(8) . . ? 
Si1 C1 H1A 109.5 . . ? 
Si1 C1 H1B 109.5 . . ? 
H1A C1 H1B 109.5 . . ? 
Si1 C1 H1C 109.5 . . ? 
H1A C1 H1C 109.5 . . ? 
H1B C1 H1C 109.5 . . ? 
Si1 C2 H2A 109.5 . . ? 
Si1 C2 H2B 109.5 . . ? 
H2A C2 H2B 109.5 . . ? 
Si1 C2 H2C 109.5 . . ? 
H2A C2 H2C 109.5 . . ? 
H2B C2 H2C 109.5 . . ? 
P1 C3 Si1 107.54(10) . . ? 
P1 C3 H3A 110.2 . . ? 
Si1 C3 H3A 110.2 . . ? 
P1 C3 H3B 110.2 . . ? 
Si1 C3 H3B 110.2 . . ? 
H3A C3 H3B 108.5 . . ? 
C5 C4 C6 109.81(16) . . ? 
C5 C4 P1 111.57(14) . . ? 
C6 C4 P1 113.94(13) . . ? 
C5 C4 H4A 107.1 . . ? 
C6 C4 H4A 107.1 . . ? 
P1 C4 H4A 107.1 . . ? 
C4 C5 H5A 109.5 . . ? 
C4 C5 H5B 109.5 . . ? 
H5A C5 H5B 109.5 . . ? 
C4 C5 H5C 109.5 . . ? 
H5A C5 H5C 109.5 . . ? 
H5B C5 H5C 109.5 . . ? 
C4 C6 H6A 109.5 . . ? 
C4 C6 H6B 109.5 . . ? 
H6A C6 H6B 109.5 . . ? 
C4 C6 H6C 109.5 . . ? 
H6A C6 H6C 109.5 . . ? 
H6B C6 H6C 109.5 . . ? 
C9 C7 C8 112.5(2) . . ? 
C9 C7 P1 112.25(14) . . ? 
C8 C7 P1 110.23(15) . . ? 
C9 C7 H7A 107.2 . . ? 
C8 C7 H7A 107.2 . . ? 
P1 C7 H7A 107.2 . . ? 
C7 C8 H8A 109.5 . . ? 
C7 C8 H8B 109.5 . . ? 
H8A C8 H8B 109.5 . . ? 
C7 C8 H8C 109.5 . . ? 
H8A C8 H8C 109.5 . . ? 
H8B C8 H8C 109.5 . . ? 
C7 C9 H9A 109.5 . . ? 
C7 C9 H9B 109.5 . . ? 
H9A C9 H9B 109.5 . . ? 
C7 C9 H9C 109.5 . . ? 
H9A C9 H9C 109.5 . . ? 
H9B C9 H9C 109.5 . . ? 
Si2 C10 H10A 109.5 . . ? 
Si2 C10 H10B 109.5 . . ? 
H10A C10 H10B 109.5 . . ? 
Si2 C10 H10C 109.5 . . ? 
H10A C10 H10C 109.5 . . ? 
H10B C10 H10C 109.5 . . ? 
Si2 C11 H11A 109.5 . . ? 
Si2 C11 H11B 109.5 . . ? 
H11A C11 H11B 109.5 . . ? 
Si2 C11 H11C 109.5 . . ? 
H11A C11 H11C 109.5 . . ? 
H11B C11 H11C 109.5 . . ? 
P2 C12 Si2 108.45(9) . . ? 
P2 C12 H12A 110.0 . . ? 
Si2 C12 H12A 110.0 . . ? 
P2 C12 H12B 110.0 . . ? 
Si2 C12 H12B 110.0 . . ? 
H12A C12 H12B 108.4 . . ? 
C15 C13 C14 109.67(15) . . ? 
C15 C13 P2 115.81(12) . . ? 
C14 C13 P2 109.29(12) . . ? 
C15 C13 H13A 107.2 . . ? 
C14 C13 H13A 107.2 . . ? 
P2 C13 H13A 107.2 . . ? 
C13 C14 H14A 109.5 . . ? 
C13 C14 H14B 109.5 . . ? 
H14A C14 H14B 109.5 . . ? 
C13 C14 H14C 109.5 . . ? 
H14A C14 H14C 109.5 . . ? 
H14B C14 H14C 109.5 . . ? 
C13 C15 H15A 109.5 . . ? 
C13 C15 H15B 109.5 . . ? 
H15A C15 H15B 109.5 . . ? 
C13 C15 H15C 109.5 . . ? 
H15A C15 H15C 109.5 . . ? 
H15B C15 H15C 109.5 . . ? 
C17 C16 C18 109.68(17) . . ? 
C17 C16 P2 112.03(13) . . ? 
C18 C16 P2 111.46(12) . . ? 
C17 C16 H16A 107.8 . . ? 
C18 C16 H16A 107.8 . . ? 
P2 C16 H16A 107.8 . . ? 
C16 C17 H17A 109.5 . . ? 
C16 C17 H17B 109.5 . . ? 
H17A C17 H17B 109.5 . . ? 
C16 C17 H17C 109.5 . . ? 
H17A C17 H17C 109.5 . . ? 
H17B C17 H17C 109.5 . . ? 
C16 C18 H18A 109.5 . . ? 
C16 C18 H18B 109.5 . . ? 
H18A C18 H18B 109.5 . . ? 
C16 C18 H18C 109.5 . . ? 
H18A C18 H18C 109.5 . . ? 
H18B C18 H18C 109.5 . . ? 
C25 N2 C21 117.03(16) . . ? 
C25 N2 Re1 125.25(13) . . ? 
C21 N2 Re1 117.72(12) . . ? 
C20 C19 Re1 125.44(14) . . ? 
C20 C19 H19A 117.3 . . ? 
Re1 C19 H19A 117.3 . . ? 
C19 C20 C21 112.51(16) . . ? 
C19 C20 H20A 123.7 . . ? 
C21 C20 H20A 123.7 . . ? 
N2 C21 C20 112.78(16) . . ? 
N2 C21 C22 121.12(19) . . ? 
C20 C21 C22 126.09(18) . . ? 
C23 C22 C21 120.1(2) . . ? 
C23 C22 H22A 120.0 . . ? 
C21 C22 H22A 120.0 . . ? 
C22 C23 C24 119.1(2) . . ? 
C22 C23 H23A 120.4 . . ? 
C24 C23 H23A 120.4 . . ? 
C25 C24 C23 119.2(2) . . ? 
C25 C24 H24A 120.4 . . ? 
C23 C24 H24A 120.4 . . ? 
N2 C25 C24 123.5(2) . . ? 
N2 C25 H25A 118.2 . . ? 
C24 C25 H25A 118.2 . . ? 
 
loop_ 
 _geom_torsion_atom_site_label_1 
 _geom_torsion_atom_site_label_2 
 _geom_torsion_atom_site_label_3 
 _geom_torsion_atom_site_label_4 
 _geom_torsion 
 _geom_torsion_site_symmetry_1 
 _geom_torsion_site_symmetry_2 
 _geom_torsion_site_symmetry_3 
 _geom_torsion_site_symmetry_4 
 _geom_torsion_publ_flag 
C19 Re1 P1 C3 -108.25(10) . . . . ? 
N1 Re1 P1 C3 11.26(9) . . . . ? 
N2 Re1 P1 C3 -179.20(9) . . . . ? 
P2 Re1 P1 C3 42.67(13) . . . . ? 
C19 Re1 P1 C7 11.18(10) . . . . ? 
N1 Re1 P1 C7 130.69(9) . . . . ? 
N2 Re1 P1 C7 -59.77(9) . . . . ? 
P2 Re1 P1 C7 162.10(11) . . . . ? 
C19 Re1 P1 C4 136.49(9) . . . . ? 
N1 Re1 P1 C4 -104.00(8) . . . . ? 
N2 Re1 P1 C4 65.54(8) . . . . ? 
P2 Re1 P1 C4 -72.59(12) . . . . ? 
C19 Re1 P2 C12 141.85(9) . . . . ? 
N1 Re1 P2 C12 21.92(8) . . . . ? 
N2 Re1 P2 C12 -147.25(8) . . . . ? 
P1 Re1 P2 C12 -9.54(12) . . . . ? 
C19 Re1 P2 C16 -98.72(9) . . . . ? 
N1 Re1 P2 C16 141.35(8) . . . . ? 
N2 Re1 P2 C16 -27.82(8) . . . . ? 
P1 Re1 P2 C16 109.90(11) . . . . ? 
C19 Re1 P2 C13 26.04(8) . . . . ? 
N1 Re1 P2 C13 -93.89(8) . . . . ? 
N2 Re1 P2 C13 96.94(8) . . . . ? 
P1 Re1 P2 C13 -125.35(10) . . . . ? 
C1 Si1 N1 Si2 104.41(12) . . . . ? 
C2 Si1 N1 Si2 -17.08(14) . . . . ? 
C3 Si1 N1 Si2 -133.96(11) . . . . ? 
C1 Si1 N1 Re1 -80.57(11) . . . . ? 
C2 Si1 N1 Re1 157.94(9) . . . . ? 
C3 Si1 N1 Re1 41.06(12) . . . . ? 
C10 Si2 N1 Si1 87.90(12) . . . . ? 
C11 Si2 N1 Si1 -34.47(14) . . . . ? 
C12 Si2 N1 Si1 -154.95(10) . . . . ? 
C10 Si2 N1 Re1 -87.00(11) . . . . ? 
C11 Si2 N1 Re1 150.62(11) . . . . ? 
C12 Si2 N1 Re1 30.15(11) . . . . ? 
C19 Re1 N1 Si1 68.95(10) . . . . ? 
N2 Re1 N1 Si1 -100.7(3) . . . . ? 
P2 Re1 N1 Si1 154.13(8) . . . . ? 
P1 Re1 N1 Si1 -30.65(7) . . . . ? 
C19 Re1 N1 Si2 -115.85(9) . . . . ? 
N2 Re1 N1 Si2 74.5(3) . . . . ? 
P2 Re1 N1 Si2 -30.67(7) . . . . ? 
P1 Re1 N1 Si2 144.55(8) . . . . ? 
C7 P1 C3 Si1 -122.53(11) . . . . ? 
C4 P1 C3 Si1 131.24(11) . . . . ? 
Re1 P1 C3 Si1 7.67(14) . . . . ? 
N1 Si1 C3 P1 -27.34(14) . . . . ? 
C1 Si1 C3 P1 92.41(13) . . . . ? 
C2 Si1 C3 P1 -150.26(12) . . . . ? 
C3 P1 C4 C5 -61.58(16) . . . . ? 
C7 P1 C4 C5 -168.34(15) . . . . ? 
Re1 P1 C4 C5 57.19(16) . . . . ? 
C3 P1 C4 C6 63.47(17) . . . . ? 
C7 P1 C4 C6 -43.29(17) . . . . ? 
Re1 P1 C4 C6 -177.77(12) . . . . ? 
C3 P1 C7 C9 -168.94(15) . . . . ? 
C4 P1 C7 C9 -62.51(16) . . . . ? 
Re1 P1 C7 C9 68.81(16) . . . . ? 
C3 P1 C7 C8 64.86(18) . . . . ? 
C4 P1 C7 C8 171.29(17) . . . . ? 
Re1 P1 C7 C8 -57.40(19) . . . . ? 
C16 P2 C12 Si2 -139.87(9) . . . . ? 
C13 P2 C12 Si2 112.95(10) . . . . ? 
Re1 P2 C12 Si2 -10.37(11) . . . . ? 
N1 Si2 C12 P2 -8.82(12) . . . . ? 
C10 Si2 C12 P2 109.63(11) . . . . ? 
C11 Si2 C12 P2 -134.12(12) . . . . ? 
C12 P2 C13 C15 66.27(16) . . . . ? 
C16 P2 C13 C15 -41.13(16) . . . . ? 
Re1 P2 C13 C15 -174.50(12) . . . . ? 
C12 P2 C13 C14 -58.16(14) . . . . ? 
C16 P2 C13 C14 -165.56(13) . . . . ? 
Re1 P2 C13 C14 61.07(14) . . . . ? 
C12 P2 C16 C17 64.37(15) . . . . ? 
C13 P2 C16 C17 171.67(14) . . . . ? 
Re1 P2 C16 C17 -57.98(16) . . . . ? 
C12 P2 C16 C18 -172.29(13) . . . . ? 
C13 P2 C16 C18 -65.00(14) . . . . ? 
Re1 P2 C16 C18 65.35(14) . . . . ? 
C19 Re1 N2 C25 -176.85(15) . . . . ? 
N1 Re1 N2 C25 -6.3(4) . . . . ? 
P2 Re1 N2 C25 97.72(14) . . . . ? 
P1 Re1 N2 C25 -76.12(14) . . . . ? 
C19 Re1 N2 C21 3.45(12) . . . . ? 
N1 Re1 N2 C21 174.0(2) . . . . ? 
P2 Re1 N2 C21 -81.98(12) . . . . ? 
P1 Re1 N2 C21 104.17(12) . . . . ? 
N1 Re1 C19 C20 177.66(14) . . . . ? 
N2 Re1 C19 C20 -4.44(15) . . . . ? 
P2 Re1 C19 C20 93.93(16) . . . . ? 
P1 Re1 C19 C20 -90.52(16) . . . . ? 
Re1 C19 C20 C21 4.6(2) . . . . ? 
C25 N2 C21 C20 177.96(16) . . . . ? 
Re1 N2 C21 C20 -2.31(19) . . . . ? 
C25 N2 C21 C22 -0.7(3) . . . . ? 
Re1 N2 C21 C22 179.06(15) . . . . ? 
C19 C20 C21 N2 -1.0(2) . . . . ? 
C19 C20 C21 C22 177.51(19) . . . . ? 
N2 C21 C22 C23 0.3(3) . . . . ? 
C20 C21 C22 C23 -178.1(2) . . . . ? 
C21 C22 C23 C24 0.1(4) . . . . ? 
C22 C23 C24 C25 -0.1(3) . . . . ? 
C21 N2 C25 C24 0.6(3) . . . . ? 
Re1 N2 C25 C24 -179.06(15) . . . . ? 
C23 C24 C25 N2 -0.2(3) . . . . ? 
 
_diffrn_measured_fraction_theta_max    0.998 
_diffrn_reflns_theta_full              30.03 
_diffrn_measured_fraction_theta_full   0.998 
_refine_diff_density_max    1.757 
_refine_diff_density_min   -0.387 
_refine_diff_density_rms    0.075 
